# Supplementary material for: Crystal facet dependence of the ketonization of propionic acid on anatase TiO2
Source: Royal Society of Chemistry journal article supplement (doi:10.1039/d3cy00917c), 2023-01-01
Supplement: d3cy00917c1.pdf [file d3cy00917c1.pdf]

## Supporting Information

### Crystal facet dependence of ketonization of propionic acid on anatase TiO<sub>2</sub>

Jiao Huang,<sup>‡a</sup> Liwen Li,<sup>‡a</sup> Xiaoxia Wu,<sup>a</sup> Yonghua Guo,<sup>a</sup> Zijun Yang,<sup>a</sup> Hua Wang,<sup>a</sup>  
Qingfeng Ge<sup>b</sup> and Xinli Zhu<sup>\*ac</sup>

<sup>a</sup> Collaborative Innovation Center of Chemical Science and Engineering, Key Laboratory for Green Chemical Technology of Ministry of Education, School of Chemical Engineering and Technology, Tianjin University, Tianjin, 300072, China

<sup>b</sup> Department of Chemistry and Biochemistry, Southern Illinois University, Carbondale, IL, 62901, United States

<sup>c</sup> Haihe Laboratory of Sustainable Chemical Transformations, Tianjin, 300192, China

<sup>‡</sup> These authors contributed equally.

\* Corresponding Author.

Email address: [xinlizhu@tju.edu.cn](mailto:xinlizhu@tju.edu.cn) (X.L. Zhu)

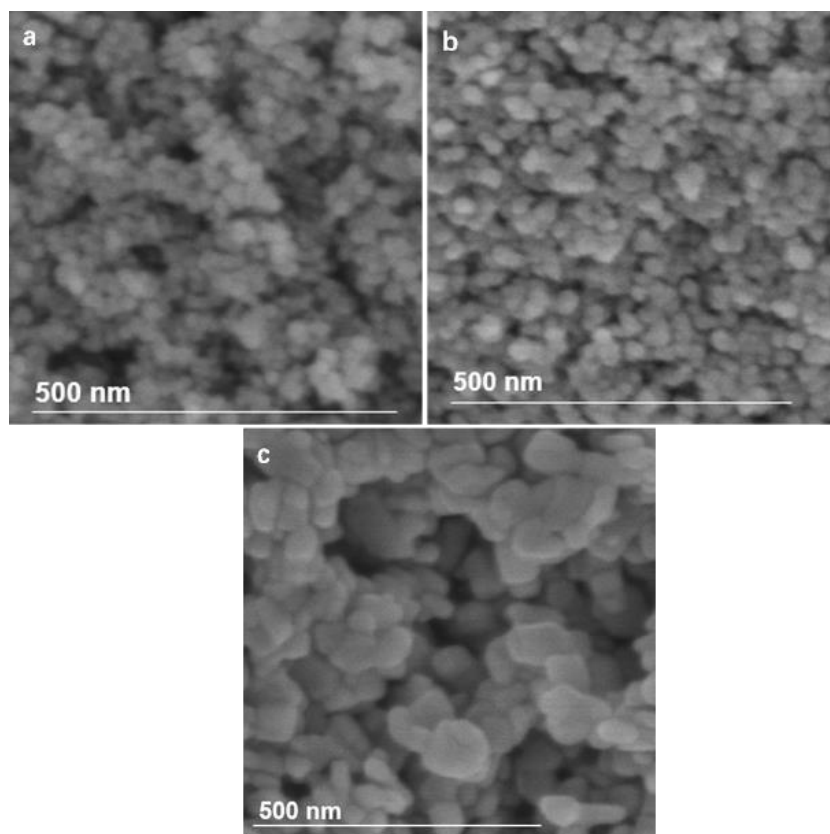

**Fig. S1** SEM images for (a)  $\text{TiO}_2(101)$ , (b)  $\text{TiO}_2(100)$  and (c)  $\text{TiO}_2(001)$ .

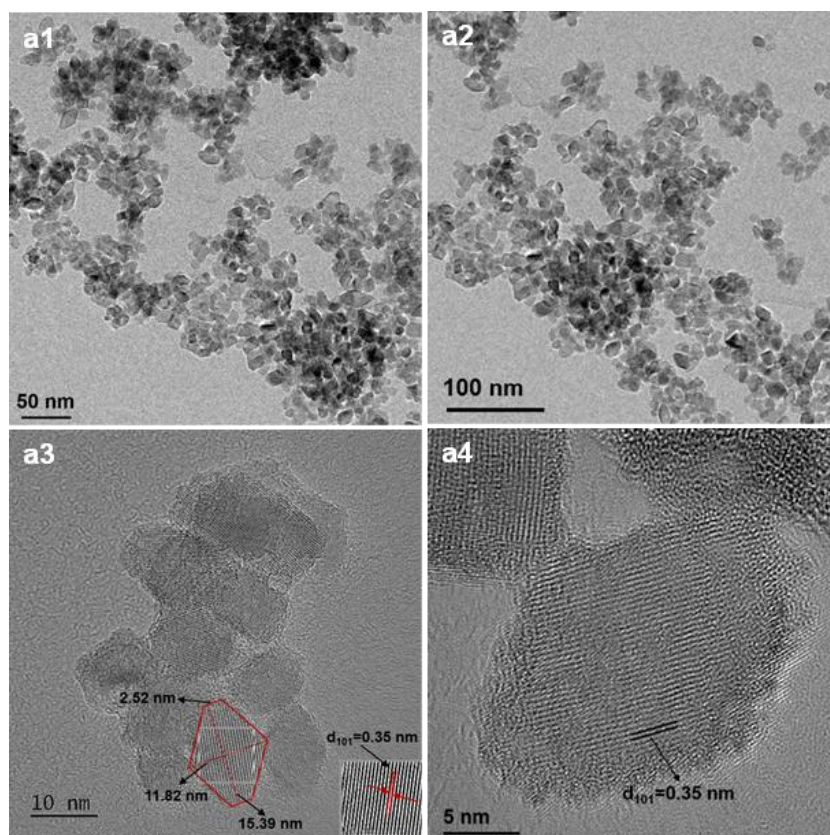

**Fig. S2** TEM images for  $\text{TiO}_2(101)$ .

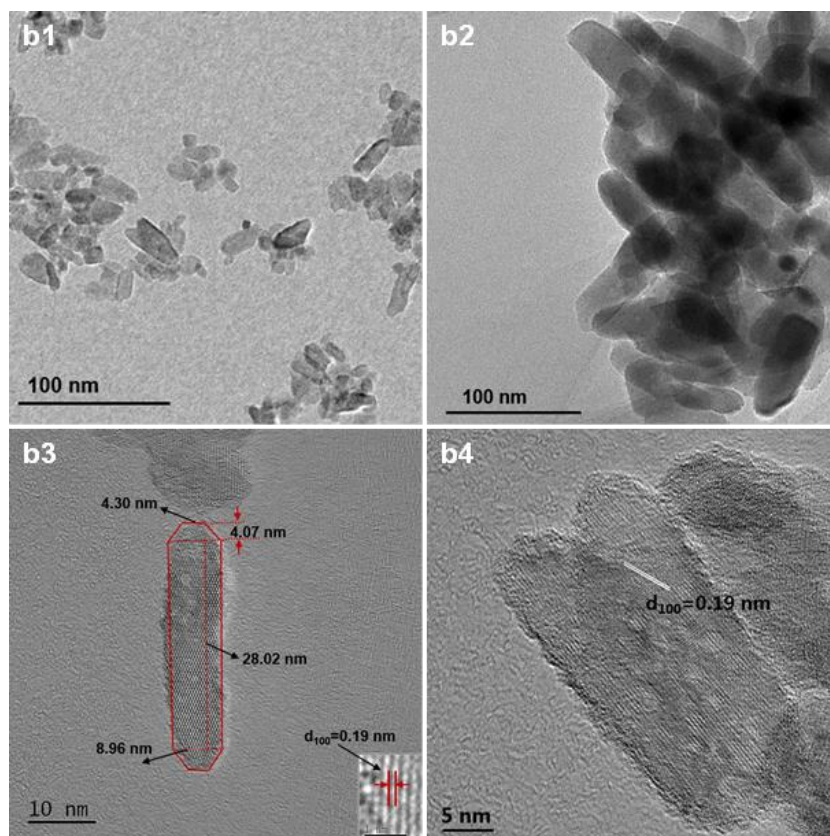

Fig. S3 TEM images for  $\text{TiO}_2(100)$ .

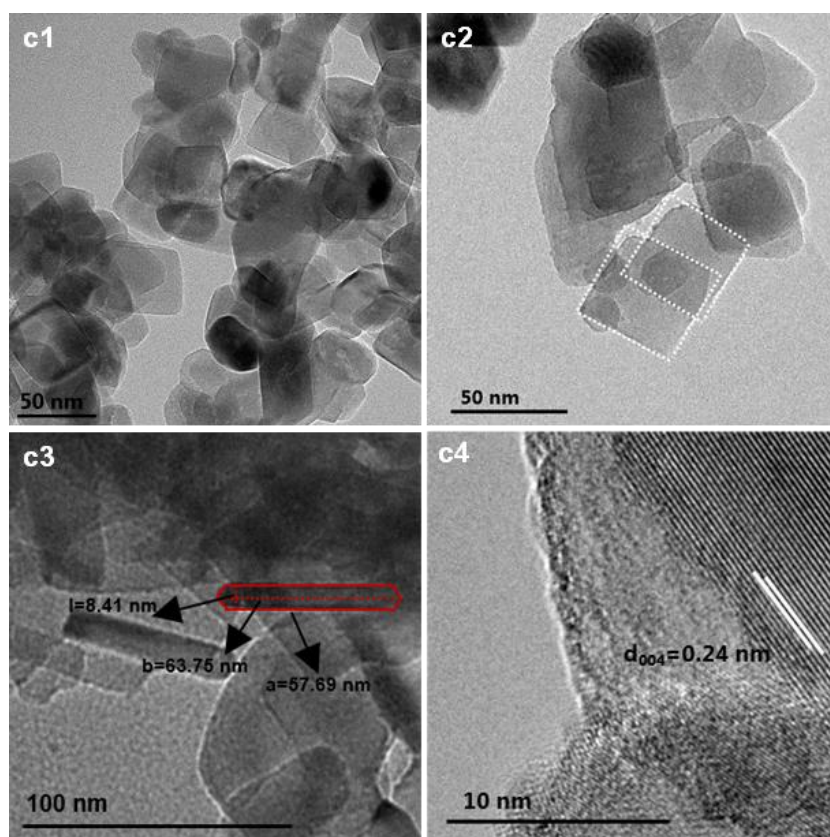

Fig. S4 TEM images for  $\text{TiO}_2(001)$ .

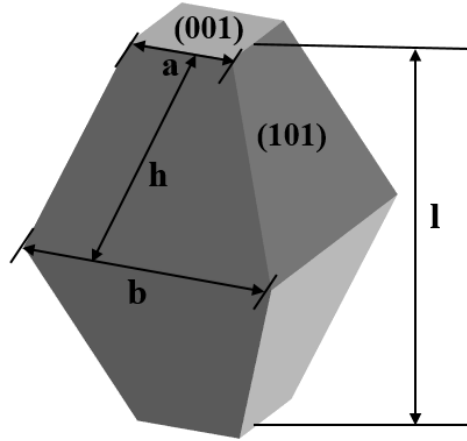

**Fig. S5** Calculation of facets percentage of  $\text{TiO}_2(101)$ .

$$a = 2.52 \text{ nm}$$

$$b = 11.82 \text{ nm}$$

$$l = 15.39 \text{ nm}$$

$$h^2 = \left(\frac{b-a}{2}\right)^2 + \left(\frac{l}{2}\right)^2$$

$$S_{001} = a^2$$

$$S_{101} = \frac{1}{2} \times (a+b) \times h$$

$$\text{percentage of } 101 = \frac{S_{101} \times 8}{S_{101} \times 8 + S_{001} \times 2} = 97.6\%$$

$$\text{percentage of } 001 = \frac{S_{001} \times 2}{S_{101} \times 8 + S_{001} \times 2} = 2.4\%$$

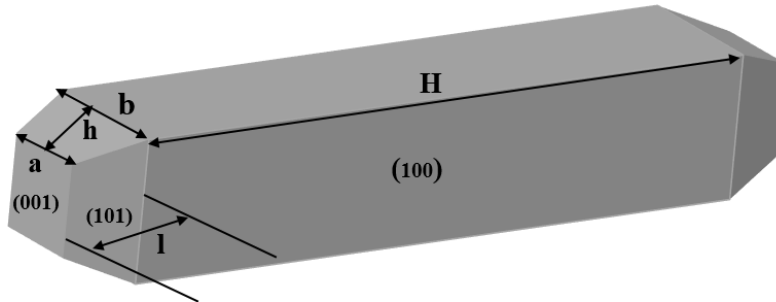

**Fig. S6** Calculation of facets percentage of  $\text{TiO}_2(100)$ .

$$a = 4.30 \text{ nm}$$

$$b = 8.96 \text{ nm}$$

$$l = 4.07 \text{ nm}$$

$$H = 28.02 \text{ nm}$$

$$h^2 = \left(\frac{b-a}{2}\right)^2 + (l)^2$$

$$S_{001} = a^2$$

$$S_{100} = b \times H$$

$$S_{101} = \frac{1}{2} \times (a+b) \times h$$

$$\text{percentage of } 100 = \frac{S_{100} \times 4}{S_{101} \times 8 + S_{001} \times 2 + S_{100} \times 4} = 77.8\%$$

$$\text{percentage of } 101 = \frac{S_{101} \times 8}{S_{101} \times 8 + S_{001} \times 2 + S_{100} \times 4} = 19.3\%$$

$$\text{percentage of } 001 = \frac{S_{001} \times 2}{S_{101} \times 8 + S_{001} \times 2 + S_{100} \times 4} = 2.9\%$$

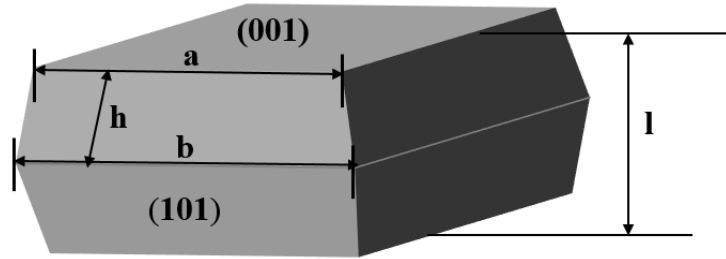

**Fig. S7** Calculation of facets percentage of  $\text{TiO}_2(001)$ .

$$a = 57.69 \text{ nm}$$

$$b = 63.75 \text{ nm}$$

$$l = 8.41 \text{ nm}$$

$$h^2 = \left(\frac{b-a}{2}\right)^2 + \left(\frac{l}{2}\right)^2$$

$$S_{001} = a^2$$

$$S_{101} = \frac{1}{2} \times (a+b) \times h$$

$$\text{percentage of } 001 = \frac{S_{001} \times 2}{S_{101} \times 8 + S_{001} \times 2} = 72.6\%$$

$$\text{percentage of } 101 = \frac{S_{101} \times 8}{S_{101} \times 8 + S_{001} \times 2} = 27.4\%$$

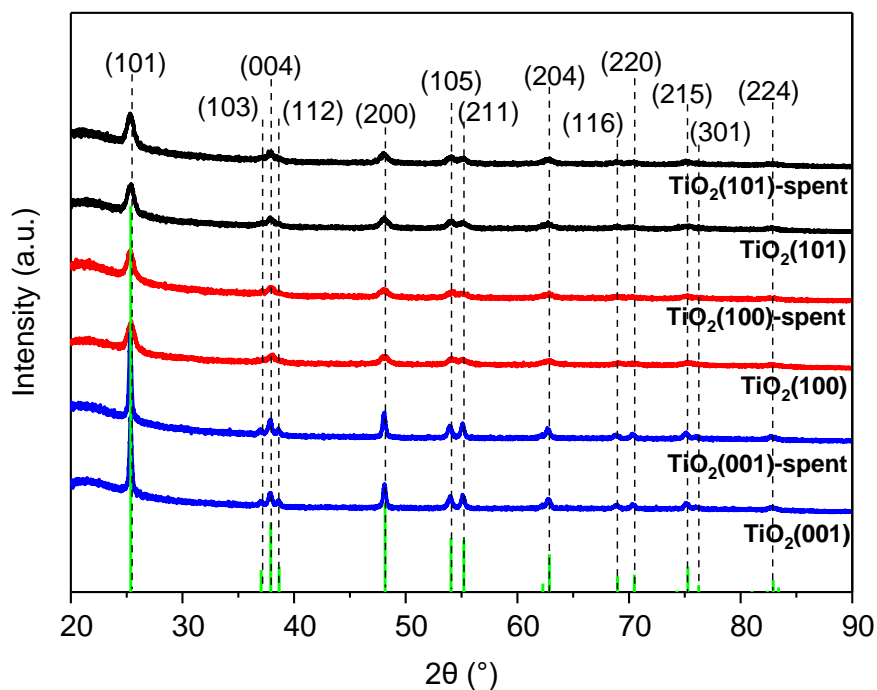

**Fig. S8** X-ray diffraction patterns of spent  $\text{TiO}_2$  catalysts. Reaction conditions:  $T = 350\text{ }^\circ\text{C}$ ,  $P_{\text{total}} = 101.325\text{ kPa}$ ,  $P_{\text{acid}} = 4.0\text{ kPa}$ ,  $W/F = 0.2\text{ h}$ , reaction time = 10 h.

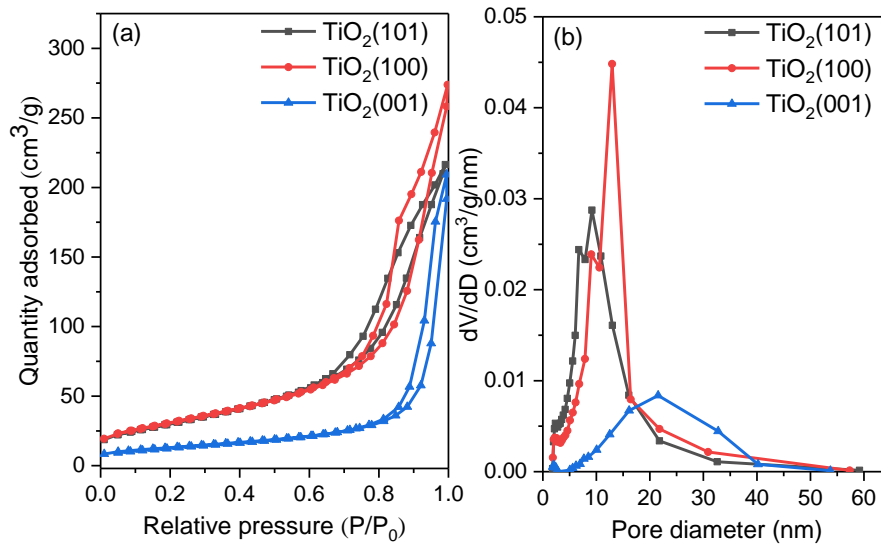

**Fig. S9**  $\text{N}_2$  adsorption and desorption isotherms (a) and BJH pore size distribution (b) on  $\text{TiO}_2$  catalysts.

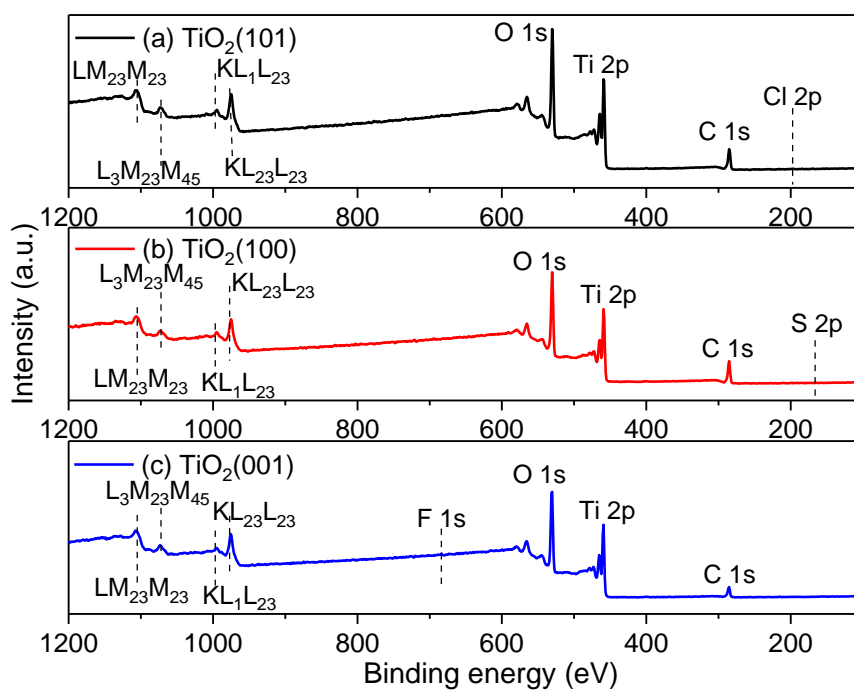

**Fig. S10** XPS survey spectra of (a) TiO<sub>2</sub>(101), (b) TiO<sub>2</sub>(100) and (c) TiO<sub>2</sub>(001).

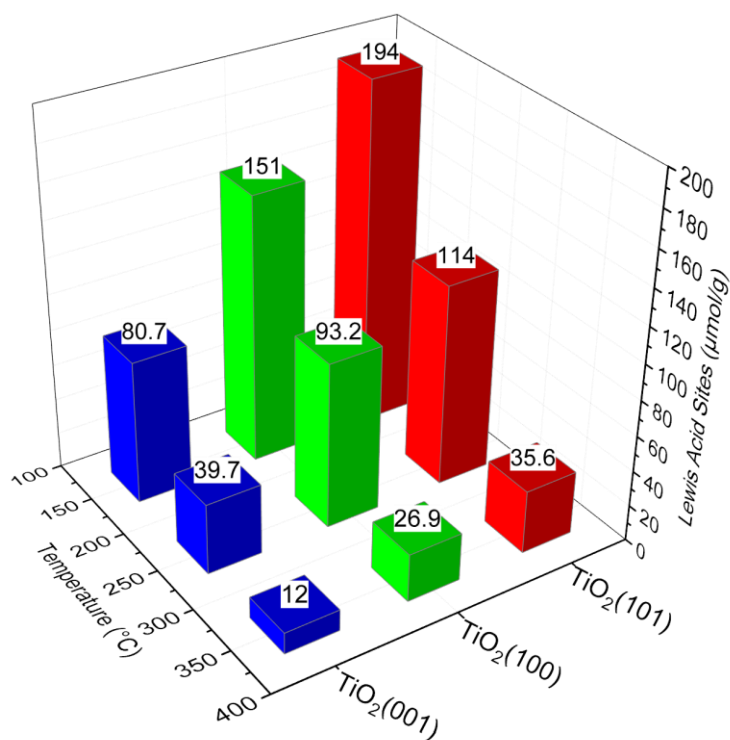

**Fig. S11** The estimated Lewis acid sites densities determined by pyridine thermal desorption IR spectra on TiO<sub>2</sub> catalysts at 150 °C, 250 °C and 350 °C.

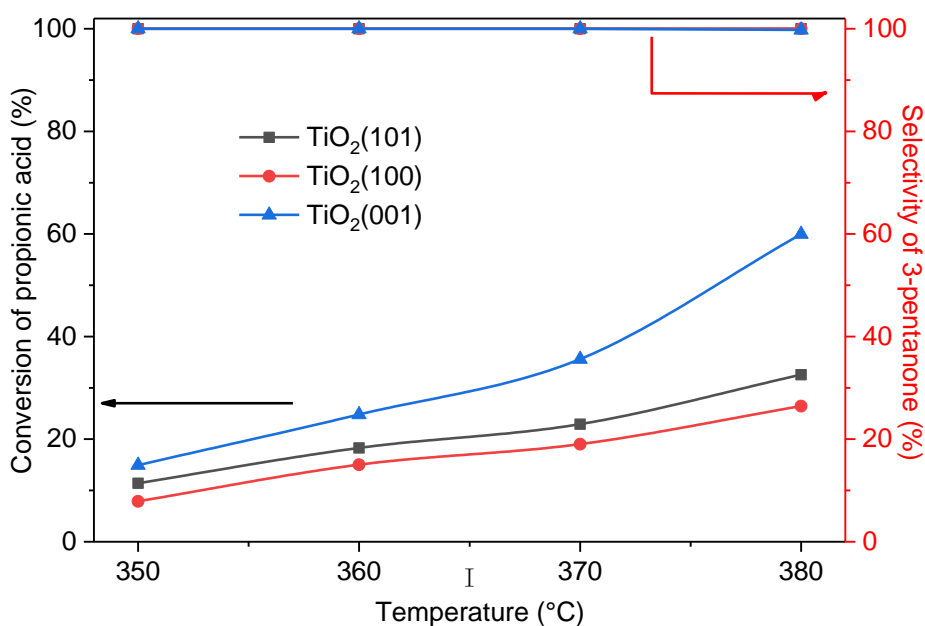

**Fig. S12** Conversion of propionic acid and selectivity of 3-pentanone on the TiO<sub>2</sub> catalysts as a function of temperature. Reaction conditions: P<sub>total</sub> = 101.325 kPa, P<sub>acid</sub> = 4.0 kPa, W/F = 0.05 h.

**Table S1** Comparison of ketonization of small carboxylic acid on different oxide catalysts.

| Entry | Catalysts                                          | Reaction condition | Conversion (%) | Selectivity (%) | Yield (%) | Reference |
|-------|----------------------------------------------------|--------------------|----------------|-----------------|-----------|-----------|
| 1     | TiO <sub>2</sub> (101)                             | a                  | 11.39          | 100             | 11.39     | this work |
| 2     | TiO <sub>2</sub> (100)                             | a                  | 7.87           | 100             | 7.87      | this work |
| 3     | TiO <sub>2</sub> (001)                             | a                  | 14.92          | 100             | 14.92     | this work |
| 4     | rutile                                             | b                  | 92             | 95              | 87.4      |           |
| 5     | brookite                                           | b                  | 56             | 95              | 53.2      | 1         |
| 6     | anatase                                            | b                  | 10             | 77              | 7.7       |           |
| 7     | CeO <sub>2</sub>                                   | c                  | 36.3           | 99.7            | 36.1      | 2         |
| 8     | CeO <sub>2</sub> -P                                | a                  | 11.1           | 99.6            | 11.0      | 3         |
| 9     | CeO <sub>2</sub> -UiO-450                          | a                  | 35.7           | 99.8            | 36.6      |           |
| 10    | CeO <sub>2</sub> -R                                | a                  | 65.6           | >99             | 64.9      | 4         |
| 11    | Ce <sub>0.1</sub> Zr <sub>0.9</sub> O <sub>2</sub> | a                  | 31.7           | >95             | 30.4      | 5         |
| 12    | t-ZrO <sub>2</sub>                                 | d                  | 26             | >97.5           | 25.4      | 6         |
| 13    | Ca/Zn/AlO <sub>x</sub>                             | e                  | 92             | 100             | 92        | 7         |
| 14    | Fe <sub>3</sub> O <sub>4</sub> /SiO <sub>2</sub>   | f                  | 50             | 59              | 29.5      | 8         |
| 15    | 0.17La <sub>x</sub> Zr <sub>y</sub> O <sub>z</sub> | g                  | 30             | 100             | 30        | 9         |
| 16    | CeFeO <sub>x</sub>                                 | h                  | 87             | 100             | 87        | 10        |
| 17    | Zn-Cr (10:1)                                       | i                  | 70             | 100             | 70        | 11        |

a. Reaction conditions: T = 350 °C, P<sub>total</sub> = 101.325 kPa, P<sub>acid</sub> = 4.0 kPa, W/F = 0.05 h, and the reactant is propionic acid.

b. Reaction conditions: T = 375 °C, P<sub>total</sub> = 101.325 kPa, WHSV = 3.24 h<sup>-1</sup>, and the reactant is propionic acid.

c. Reaction conditions: T = 350 °C, P<sub>total</sub> = 101.325 kPa, W/F = 0.08 h, propionic acid was fed into the reactor at the liquid flow rate of 6.5 cm<sup>3</sup>·h<sup>-1</sup>.



- d. Reaction conditions:  $T = 350\text{ }^{\circ}\text{C}$ ,  $P_{\text{total}} = 101.325\text{ kPa}$ ,  $P_{\text{acid}} = 4.0\text{ kPa}$ ,  $W/F = 0.05\text{ h}$ , and the reactant is propionic acid.
- e. Reaction conditions:  $T = 350\text{ }^{\circ}\text{C}$ , 50 wt.% aqueous AcOH solution was pumped into the reactor with catalyst (100 mg) at a flow rate of 0.4 mL/h with  $\text{N}_2$  as carrier gas (10 mL/min).
- f. Reaction conditions:  $T = 410\text{ }^{\circ}\text{C}$ ,  $P_{\text{total}} = 101.325\text{ kPa}$ .  $\text{N}_2$  was employed as the carrier gas ( $50\text{ mL}\cdot\text{min}^{-1}$ ) and approximately 50 mg each of  $\text{Fe}_3\text{O}_4$  and  $\text{SiO}_2$  diluted with fused silica granules was used.
- g. Reaction conditions:  $T = 295\text{ }^{\circ}\text{C}$ ,  $\text{WHSV} = 3.8\text{ h}^{-1}$ . All of the catalysts were tested at 9800 kPa with a feed composed of 10 wt. % acetic acid in  $\text{H}_2\text{O}$ .
- h. Reaction condition: 0.3 g catalyst,  $40\text{ mL}\cdot\text{min}^{-1}$   $\text{N}_2$  flow rate,  $0.03\text{ mL}\cdot\text{min}^{-1}$  liquid flow rate,  $\text{TOS} = 1\text{ h}$ ,  $W/F = 0.17\text{ h}$ .
- i. Reaction condition: 1 bar pressure, 0.2 g catalyst,  $20\text{ mL}\cdot\text{min}^{-1}$   $\text{N}_2$  flow rate, 2 vol% propionic acid, 4 h time on stream,  $W/F = 4\text{ h}\cdot\text{g}\cdot\text{mol}^{-1}$ ,  $T = 350\text{ }^{\circ}\text{C}$ .

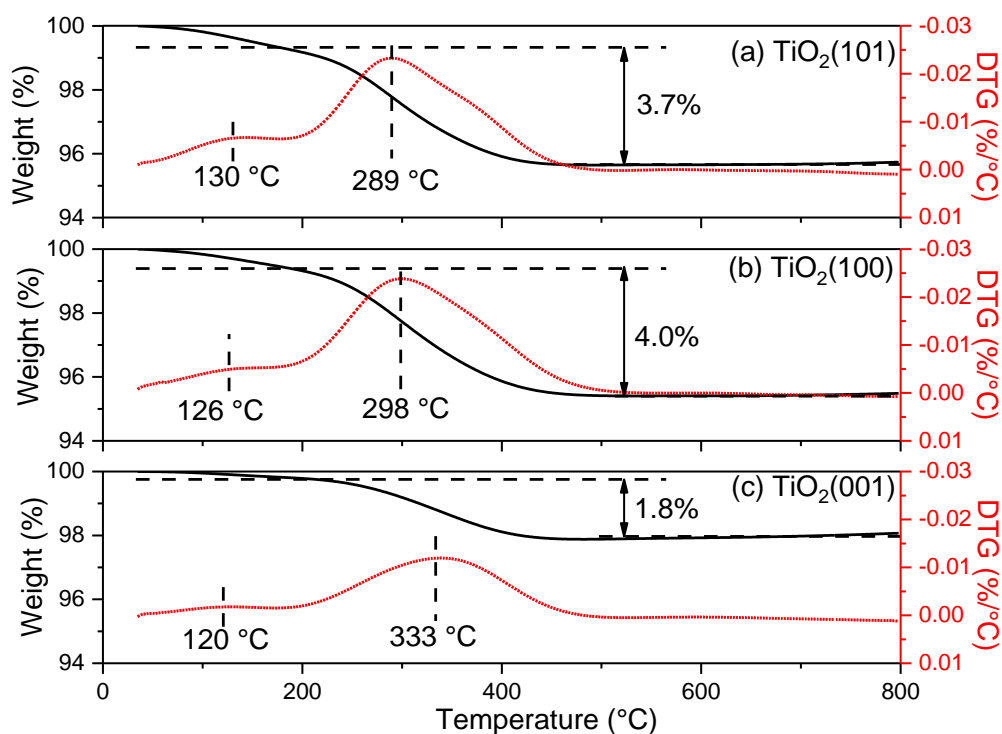

**Fig. S13** Thermogravimetric and differential thermogravimetric curves for spent (a)  $\text{TiO}_2(101)$ , (b)  $\text{TiO}_2(100)$  and (c)  $\text{TiO}_2(001)$ .

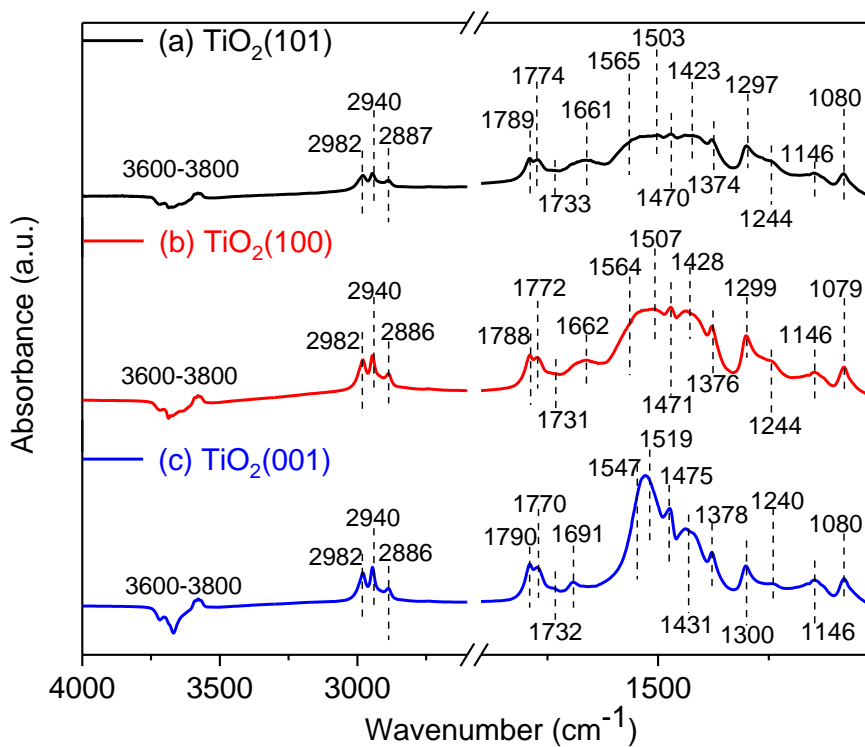

**Fig. S14** IR spectra of propionic acid saturated adsorption on (a) TiO<sub>2</sub>(101), (b) TiO<sub>2</sub>(100) and (c) TiO<sub>2</sub>(001) at 150 °C.

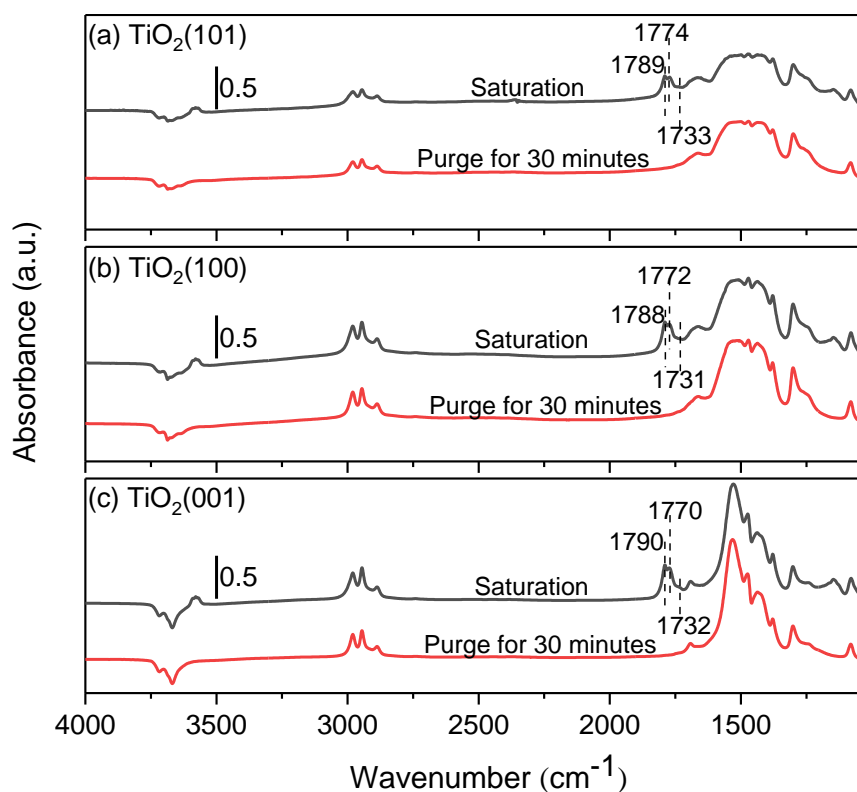

**Fig. S15** IR spectra changes of (a) TiO<sub>2</sub>(101), (b) TiO<sub>2</sub>(100) and (c) TiO<sub>2</sub>(001) with propionic acid saturated adsorption after purging in Ar flow at 150 °C.

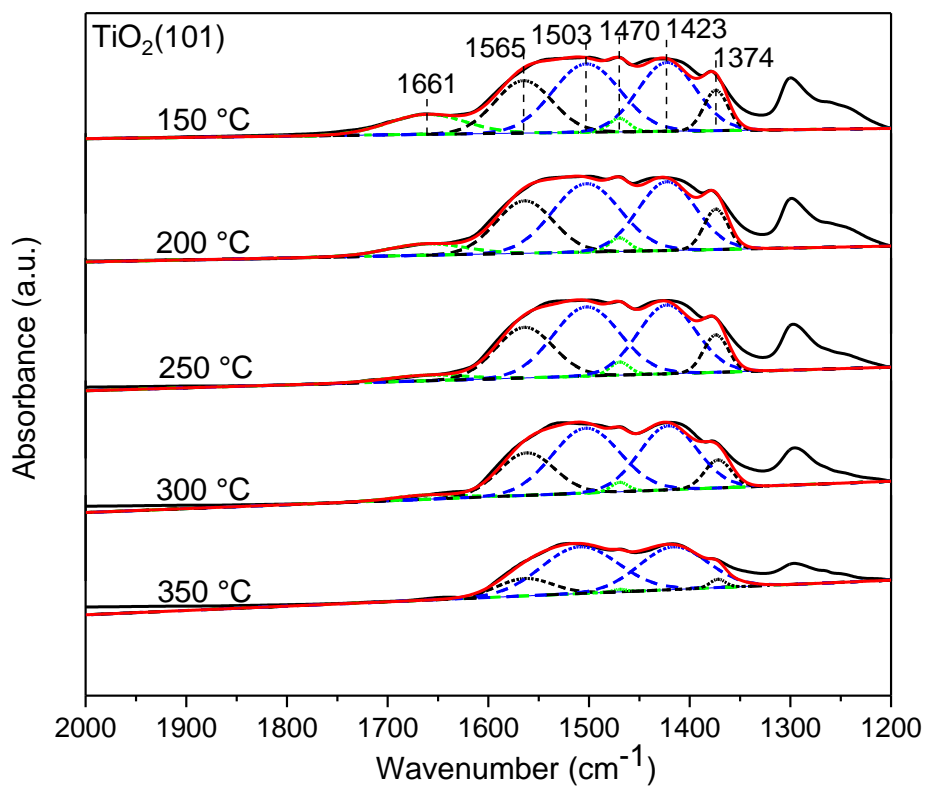

**Fig. S16** In situ IR spectra on  $\text{TiO}_2(101)$  at 150 °C-350 °C.

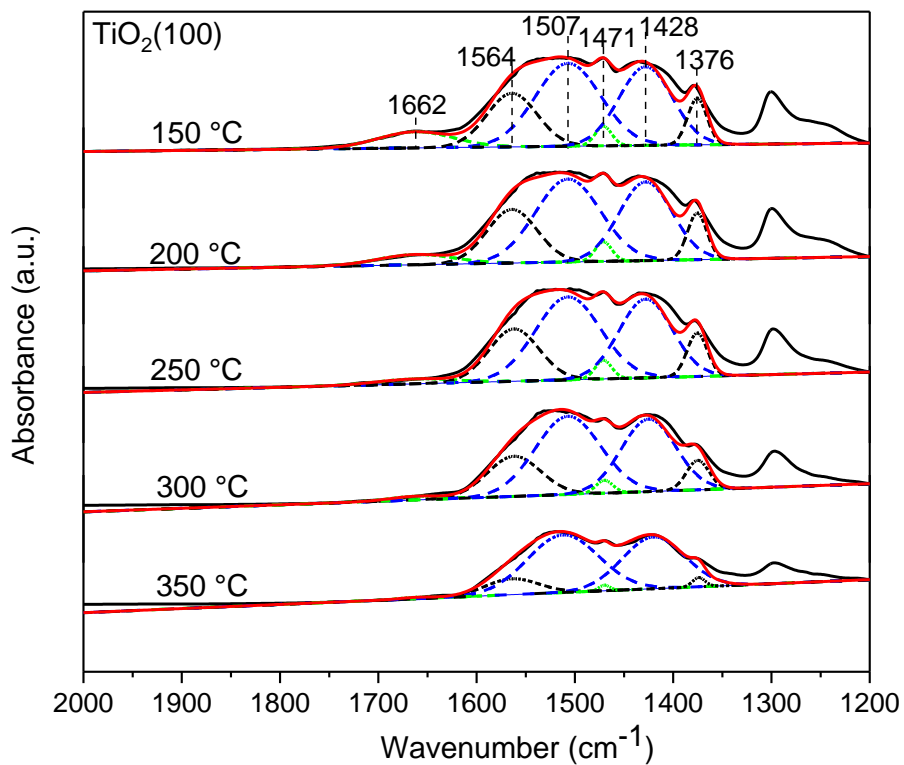

**Fig. S17** In situ IR spectra on  $\text{TiO}_2(100)$  at 150 °C-350 °C.

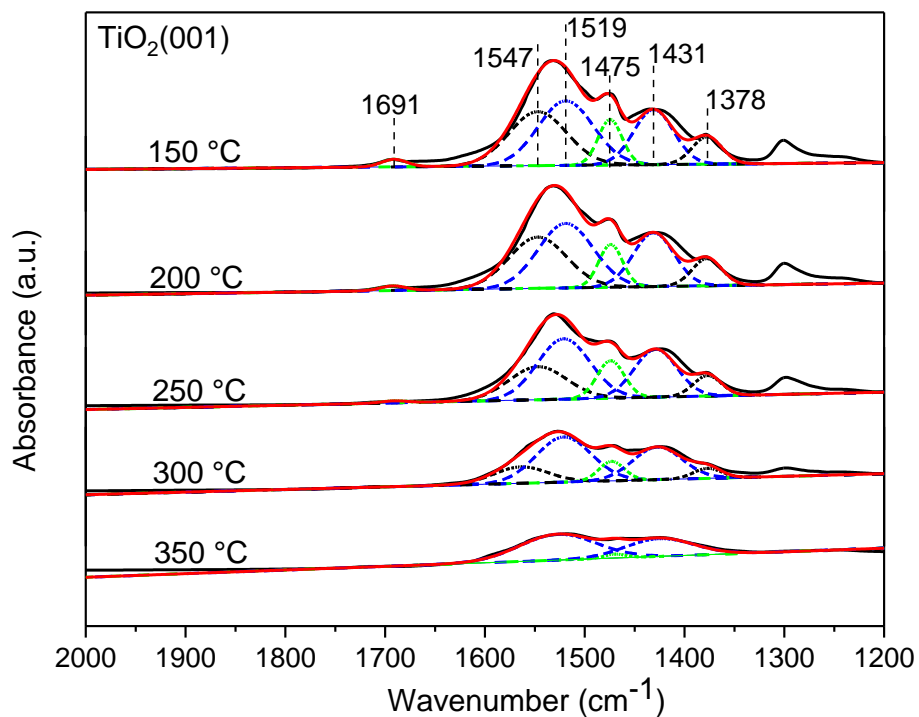

**Fig. S18** In situ IR spectra on  $\text{TiO}_2(001)$  at 150 °C-350 °C.

Fig. S16-18 show curve fittings of IR spectra (the region of propionates) of  $\text{TiO}_2$  catalysts during temperature programmed desorption of propionic acid. Solid lines represent experimental data and short dash lines represent the curve fitting data.

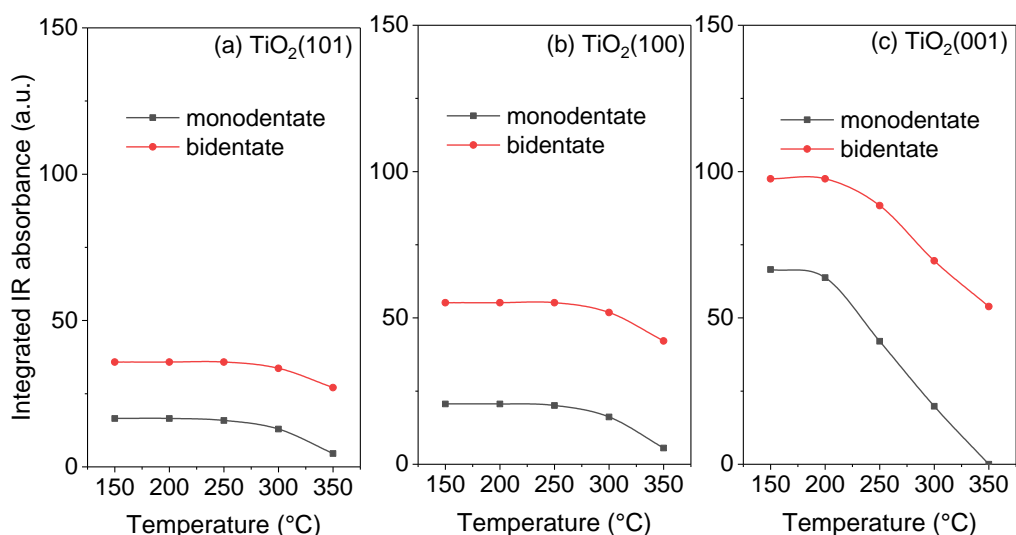

**Fig. S19** Evolution of integrated bands areas of monodentate propionate and bidentate propionate based on surface area on (a)  $\text{TiO}_2(101)$ , (b)  $\text{TiO}_2(100)$  and (c)  $\text{TiO}_2(001)$  as a function of temperature from 150 °C to 350 °C.

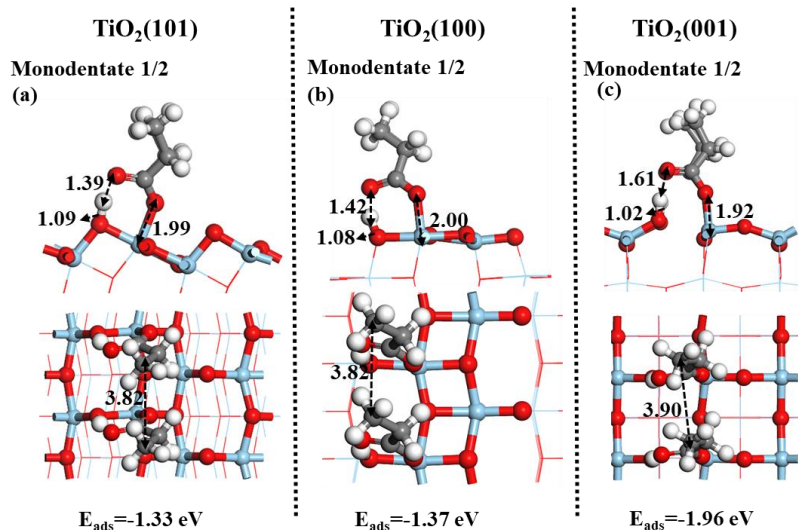

**Fig. S20** DFT-determined monodentate propionate on  $\text{TiO}_2$  (101), (100), and (001) surfaces at 1/2 ML (PBE + D3). The side and top views are shown in the top and bottom rows, respectively. Light blue, red, gray, and white spheres are Ti, O, C, and H atoms, respectively. The distances in the figure are given in Å. Ti and O atoms and Ti–O bonds in the lower layers are simplified as lines.

**Table S2** DFT-surface energy of  $\text{TiO}_2$  (101), (100), and (001) surfaces upon adsorption of propionic acid.

| Acid coverage (ML)  | Surface energy-monodentate ( $\text{J/m}^2$ ) |      |      |       | Surface energy-bidentate ( $\text{J/m}^2$ ) |      |
|---------------------|-----------------------------------------------|------|------|-------|---------------------------------------------|------|
|                     | 0                                             | 1/4  | 1/2  | 1     | 1//4                                        | 1/2  |
| $\text{TiO}_2(101)$ | 0.77                                          | 1.16 | 0.88 | 0.24  | 1.16                                        | 0.87 |
| $\text{TiO}_2(100)$ | 0.87                                          | 1.43 | 1.10 | 0.46  | 1.33                                        | 0.94 |
| $\text{TiO}_2(001)$ | 1.41                                          | 0.88 | 0.36 | -0.21 | 0.87                                        | 0.33 |

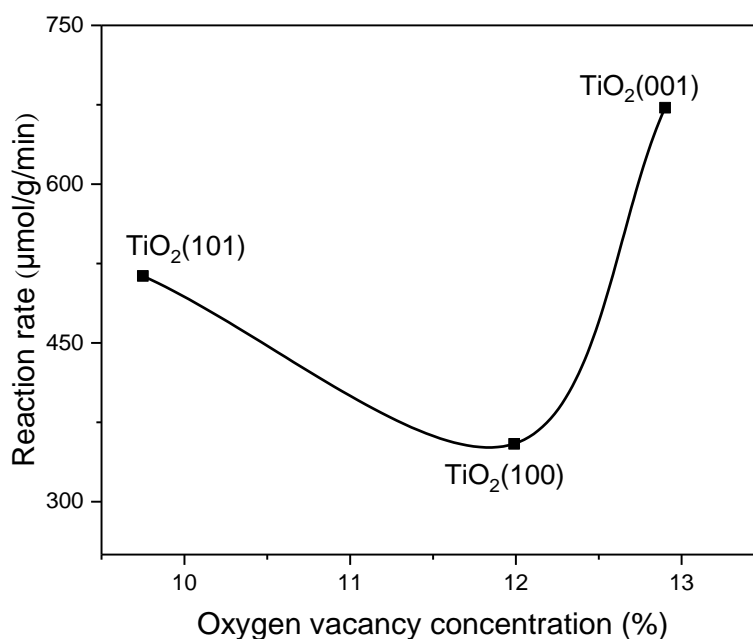

**Fig. S21** Correlation between oxygen vacancy concentration and the intrinsic reaction rate.

## Notes and references

1. E. V. Fufachev, B. M. Weckhuysen and P. C. A. Bruijninx, *ChemSusChem*, 2021, **14**, 2710-2720.
2. M. Kobune, S. Sato and R. Takahashi, *J. Mol. Catal. A: Chem.*, 2008, **279**, 10-19.
3. Y. Guo, Q. Yu, H. Fang, H. Wang, J. Han, Q. Ge and X. Zhu, *Ind. Eng. Chem. Res.*, 2020, **59**, 17269-17278.
4. Y. Guo, Y. Qin, H. Liu, H. Wang, J. Han, X. Zhu and Q. Ge, *ACS Catal.*, 2022, **12**, 2998-3012.
5. S. Ding, H. Wang, J. Han, X. Zhu and Q. Ge, *Ind. Eng. Chem. Res.*, 2018, **57**, 17086-17096.
6. S. Ding, J. Zhao and Q. Yu, *Catalysts*, 2019, **9**, 768.
7. H. Ling, Z. Wang, L. Wang, C. Stampfl, D. Wang, J. Chen and J. Huang, *Catal. Today*, 2020, **351**, 58-67.
8. J. A. Bennett, C. M. A. Parlett, M. A. Isaacs, L. J. Durndell, L. Olivi, A. F. Lee and K. Wilson, *ChemCatChem*, 2017, **9**, 1648-1654.
9. J. A. Lopez-Ruiz, A. R. Cooper, G. Li and K. O. Albrecht, *ACS Catal.*, 2017, **7**, 6400-6412.
10. F. Lu, B. Jiang, J. Wang, Z. Huang, Z. Liao and Y. Yang, *Mol. Catal.*, 2018, **444**, 22-33.
11. H. Bayahia, E. F. Kozhevnikova and I. V. Kozhevnikov, *Appl. Catal., B*, 2015, **165**, 253-259.
